# Supplementary material for: Predictors of localization, outcome, and etiology of spontaneous intracerebral hemorrhages: focus on cerebral amyloid angiopathy
Source: PubMed Central journal article supplement (PMC7248013; doi:10.1007/s00702-020-02174-2), 2020-03-19
Supplement: 702_2020_2174_MOESM3_ESM.pdf [file 702_2020_2174_MOESM3_ESM.pdf]

**Online Resource 3** Overview of studies reporting CAA-related ICH prevalence on clinical grounds. The studies are separated based on whether they reported subgroups of CAA diagnosis or not.

|                                   | Jamieson 2012 [1] <sup>a</sup> |       | Meretoja 2012 [2] |       | Palm 2013 [3]             |       | Roh 2018 [4]              |       | Present study |                    |
|-----------------------------------|--------------------------------|-------|-------------------|-------|---------------------------|-------|---------------------------|-------|---------------|--------------------|
|                                   |                                |       | SMASH-U           |       | semi-SMASH-U <sup>a</sup> |       | semi-SMASH-U <sup>a</sup> |       |               |                    |
| definite CAA                      | 0                              | 0.0%  | 10                | 4.9%  | 0                         | 0.0%  | 2                         | 2.0%  | 3             | 11.5%              |
| supportive histopathology for CAA | 0                              | 0.0%  | 2                 | 1.0%  | 0                         | 0.0%  | 6                         | 6.0%  | 0             | 0.0%               |
| probable CAA                      | 6                              | 11.3% | 36                | 17.6% | 15                        | 34.1% | 47                        | 46.5% | 13            | 50.0%              |
| possible CAA                      | 47                             | 88.7% | 157               | 76.6% | 29                        | 65.9% | 46                        | 45.5% | 10            | 38.5%              |
| all ICHs (spontaneous)            | 136                            |       | 1013              |       | 152                       |       | 425                       |       | 213           |                    |
| all CAAs / all ICHs               | 53                             | 39.0% | 205               | 20.2% | 44                        | 28.9% | 101                       | 23.8% | 26/47/92      | 23.9% <sup>c</sup> |
| probable-definite CAAs / all ICHs | 6                              | 4.4%  | 48                | 4.7%  | 15                        | 9.9%  | 55                        | 12.9% | 16/47/92      | 14.7% <sup>c</sup> |
| MRI / all ICHs                    | NA                             |       | 15.1%             |       | 20.4%                     |       | NA                        |       |               | 37.1%              |
| MRI / all CAAs                    | NA                             |       | 20.5%             |       | NA                        |       | 71.3% <sup>b</sup>        |       |               | 96.2% <sup>d</sup> |
| SWI / all ICHs                    | NA                             |       | NA                |       | NA                        |       | NA                        |       |               | 31.0%              |
| SWI / CAAs                        | NA                             |       | NA                |       | NA                        |       | NA                        |       |               | 92.3% <sup>d</sup> |
| angiography / all ICHs            | NA                             |       | 25%               |       | 26.3%                     |       | NA                        |       |               | 55.4%              |
| angiography / all CAAs            | NA                             |       | NA                |       | NA                        |       | NA                        |       |               | 100.0%             |
| cerebellar ICHs excluded from CAA | yes                            |       | yes               |       | yes                       |       | no                        |       |               | no                 |

  

|                                   | Yeh 2014 [5] |       | Cappellari 2015 [6]       |       | Owolabi 2017 [7] |      | Wu 2017 [8] |       | Forlivesi 2018 [9] |       |
|-----------------------------------|--------------|-------|---------------------------|-------|------------------|------|-------------|-------|--------------------|-------|
|                                   | SMASH-U      |       | semi-SMASH-U <sup>e</sup> |       | SMASH-U          |      | SMASH-U     |       | SMASH-U            |       |
| definite CAA                      | NA           |       | NA                        |       | NA               |      | NA          |       | NA                 |       |
| supportive histopathology for CAA | NA           |       | NA                        |       | NA               |      | NA          |       | NA                 |       |
| probable CAA                      | NA           |       | NA                        |       | NA               |      | NA          |       | NA                 |       |
| possible CAA                      | NA           |       | NA                        |       | NA               |      | NA          |       | NA                 |       |
| all CAAs / all ICHs               | 463          | 12.2% | 62                        | 14.6% | 1                | 2.4% | 344         | 23.7% | 51                 | 16.6% |
| all ICHs (spontaneous)            | 3785         |       | 424                       |       | 42               |      | 1452        |       | 308                |       |
| probable-definite CAA / all ICHs  | NA           |       | NA                        |       | NA               |      | NA          |       | NA                 |       |
| MRI / all ICHs                    | NA           |       | NA                        |       | NA               |      | NA          |       | NA                 |       |
| MRI / all CAAs                    | NA           |       | NA                        |       | NA               |      | NA          |       | NA                 |       |
| SWI / all ICHs                    | NA           |       | NA                        |       | NA               |      | NA          |       | NA                 |       |
| SWI / CAAs                        | NA           |       | NA                        |       | NA               |      | NA          |       | NA                 |       |
| angiography / all ICHs            | 25.0%        |       | NA                        |       | NA               |      | NA          |       | NA                 |       |
| angiography / all CAAs            | 39.1%        |       | NA                        |       | NA               |      | NA          |       | NA                 |       |
| cerebellar ICHs excluded from CAA | yes          |       | no                        |       | yes              |      | yes         |       | yes                |       |

CAA, cerebral amyloid angiopathy; ICH, intracerebral hemorrhage; MRI, magnetic resonance imaging; NA, not available; SWI, susceptibility-weighted imaging;

<sup>a</sup> structural etiologies not included (i.e., primary ICHs only)

<sup>b</sup> all probable/supported/definite CAA but 3 had MRI (SWI rate undisclosed); those without MRI had supportive intraoperative histology.

<sup>c</sup> data extrapolated from the rate within adequately worked-up lobar/cerebellar ICHs (i.e., MRI-SWI and angiography or neuropathology required), as detailed in the manuscript.

<sup>d</sup> all probable/definite CAA but 1 had MRI and all but 2 had SWI; those without MRI/SWI had definite CAA diagnosis post mortem.

<sup>e</sup> brainstem ICH was allowed in CAA.

## References

- Jamieson EI, Newman D, Metcalf AK, et al. (2012) Dementia is strongly associated with 90-day mortality in lobar cerebral amyloid angiopathy related intra-cerebral haemorrhage. *J Neurol Sci* 322 (1-2):161-165. <http://doi.org/10.1016/j.jns.2012.07.047>
- Meretoja A, Strbian D, Putaala J, et al. (2012) SMASH-U: a proposal for etiologic classification of intracerebral hemorrhage. *Stroke* 43 (10):2592-2597. <http://doi.org/10.1161/STROKEAHA.112.661603>
- Palm F, Henschke N, Wolf J, et al. (2013) Intracerebral haemorrhage in a population-based stroke registry (LuSSt): incidence, aetiology, functional outcome and mortality. *J Neurol* 260 (10):2541-2550. <http://doi.org/10.1007/s00415-013-7013-0>
- Roh D, Sun CH, Schmidt JM, et al. (2018) Primary Intracerebral Hemorrhage: A Closer Look at Hypertension and Cerebral Amyloid Angiopathy. *Neurocrit Care* 29 (1):77-83. <http://doi.org/10.1007/s12028-018-0514-z>
- Yeh SJ, Tang SC, Tsai LK, Jeng JS (2014) Pathogenetical subtypes of recurrent intracerebral hemorrhage: designations by SMASH-U classification system. *Stroke* 45 (9):2636-2642. <http://doi.org/10.1161/STROKEAHA.114.005598>
- Cappellari M, Zivelonghi C, Moretto G, et al. (2015) The etiologic subtype of intracerebral hemorrhage may influence the risk of significant hematoma expansion. *J Neurol Sci* 359 (1-2):293-297. <http://doi.org/10.1016/j.jns.2015.11.024>
- Owolabi M, Ogbola G, Akinyemi R, et al. (2017) Development and Reliability of a User-Friendly Multicenter Phenotyping Application for Hemorrhagic and Ischemic Stroke. *J Stroke Cerebrovasc Dis* 26 (11):2662-2670. <http://doi.org/10.1016/j.jstrokecerebrovasdis.2017.06.042>
- Wu TY, Yassi N, Shah DG, et al. (2017) Simultaneous Multiple Intracerebral Hemorrhages (SMICH). *Stroke* 48 (3):581-586. <http://doi.org/10.1161/STROKEAHA.116.015186>
- Forlivesi S, Turcato G, Zivelonghi C, et al. (2018) Association of Short- and Medium-Term Particulate Matter Exposure with Risk of Mortality after Spontaneous Intracerebral Hemorrhage. *J Stroke Cerebrovasc Dis* 27 (9):2519-2523. <http://doi.org/10.1016/j.jstrokecerebrovasdis.2018.05.007>
