# Supplementary material for: Predictors of localization, outcome, and etiology of spontaneous intracerebral hemorrhages: focus on cerebral amyloid angiopathy
Source: Springer Nature journal article supplement (doi:10.1007/s00702-020-02174-2), 2020-03-19
Supplement: MOESM4 [file 17815386]

**Online Resource 4** Discriminators of spontaneous ICHs with regard to lobar vs. non-lobar localization

|                                    |          | <b>Lobar ICH</b>        | <b>Non-lobar ICH</b>    | <b>MW/Chi<sup>2</sup></b> | <b>multivariate logistic regression</b> |                         |
|------------------------------------|----------|-------------------------|-------------------------|---------------------------|-----------------------------------------|-------------------------|
|                                    |          |                         |                         | <i>p</i>                  | <i>p</i>                                | <i>OR</i> (95% CI)      |
| Patient number                     |          | 85                      | 128                     | -                         | -                                       |                         |
| <b>Age at event*</b>               | <b>y</b> | <b>74.7 [66.2–82.2]</b> | <b>64.9 [57.8–76.6]</b> | <b>&lt;0.001</b>          | <b>0.006</b>                            | <b>1.04 (1.01–1.06)</b> |
| Sex (male/female)                  | %        | 52.9                    | 65.6                    | >0.05                     | -                                       | -                       |
| Prior ischemic stroke              | %        | 12.9                    | 12.0                    | >0.05                     | -                                       | -                       |
| Prior intracranial hemorrhage      | %        | 8.3                     | 8.0                     | >0.05                     | -                                       | -                       |
| Prior TIA (TFNE)                   | %        | 15.3                    | 7.2                     | >0.05                     | -                                       | -                       |
| Prior loss of consciousness        | %        | 10.6                    | 6.4                     | >0.05                     | -                                       | -                       |
| Family history for any stroke      | %        | 37.8                    | 29.0                    | >0.05                     | -                                       | -                       |
| Anticoagulant use                  | %        | 20.2                    | 14.3                    | >0.05                     | -                                       | -                       |
| INR>1.4                            | %        | 17.3                    | 12.5                    | >0.05                     | -                                       | -                       |
| <b>Antiplatelet use*</b>           | <b>%</b> | <b>44.6</b>             | <b>24.0</b>             | <b>0.002</b>              | <b>0.041</b>                            | <b>1.97 (10.3–3.76)</b> |
| <b>Combined antithrombotic use</b> | <b>%</b> | <b>13.3</b>             | <b>4.0</b>              | <b>0.018</b>              | >0.05                                   | -                       |
| <b>Hypertensive excess*</b>        | <b>%</b> | <b>48.2</b>             | <b>70.4</b>             | <b>0.001</b>              | <b>0.003</b>                            | <b>0.39 (0.21–0.72)</b> |
| Chronic hypertension               | %        | 88.2                    | 90.6                    | >0.05                     | -                                       | -                       |
| Case fatality (1-month)            | %        | 35.3                    | 32.8                    | >0.05                     | -                                       | -                       |

MW/Chi<sup>2</sup>, Mann-Whitney test (for Age at event) or Chi<sup>2</sup> test (for other variables); CI, confidence interval; ICH, intracerebral hemorrhage; INR, international normalized ratio; *OR*, odds ratio; TIA, transient ischemic attack; TFNE, transient focal neurological episode; y, year (median [interquartile range]); bold font indicates variables with significant difference in univariate analyses; \* indicates significant predictors in the multivariate analyses.
